# Supplementary material
Source: publisher site journal article supplement (https://www.dovepress.com/article/530939)
Supplement: Supplementary file 1 [file 530939%20Supplementary%20Material.docx]

**Supplementary Table 1**Comparison of Clinical Characteristics by Disease Status

| Disease | Indicator | Mean ± SD | *P*-value a |
| --- | --- | --- | --- |
| Glucose Metabolic Status |  |  | **< 0.001** b |
| Diabetes (N=1055) | HbA1c (%) | 7.19 ± 1.72 |  |
|  | FPG (mmol/L) | 8.53 ± 3.71 |  |
|  | PBG (mmol/L) | 13.01 ± 4.03 |  |
| Prediabetes (N=1783) | HbA1c (%) | 5.69 ± 0.35 |  |
|  | FPG (mmol/L) | 5.81 ± 0.49 |  |
|  | PBG (mmol/L) | 7.12 ± 1.82 |  |
| Normal (N=1915) | HbA1c (%) | 5.27 ± 0.27 |  |
|  | FPG (mmol/L) | 5.13 ± 0.38 |  |
|  | PBG (mmol/L) | 5.36 ± 1.21 |  |
| Hyperlipidemia |  |  | **< 0.001** b |
| Yes (N=3693) | LDL-C (mmol/L) | 3.24 ± 0.95 |  |
|  | HDL-C (mmol/L) | 1.36 ± 0.44 |  |
|  | TC (mmol/L) | 5.47 ± 1.09 |  |
|  | TG (mmol/L) | 1.83 ± 1.30 |  |
| No (N=1059) | LDL-C (mmol/L) | 2.45 ± 0.53 |  |
|  | HDL-C (mmol/L) | 1.46 ± 0.33 |  |
|  | TC (mmol/L) | 4.44 ± 0.53 |  |
|  | TG (mmol/L) | 0.98 ± 0.33 |  |
| Hypertension |  |  | **< 0.001** b |
| Yes (N=2592) | SBP (mmHg) | 137.52 ± 21.07 |  |
|  | DBP (mmHg) | 72.71 ± 15.64 |  |
| No (N=2160) | SBP (mmHg) | 117.52 ± 10.81 |  |
|  | DBP (mmHg) | 69.99 ± 9.64 |  |

**Notes：**

a *P*-values are derived from comparisons across groups.

b Bolded values indicate statistically significant results (*P*<0.05).

**Abbreviations:** HbA1c: glycohemoglobin; FPG: fasting plasma glucose; PBG: 2-hour plasma glucose; LDL-C: low-density lipoprotein cholesterol; HDL-C: high-density lipoprotein cholesterol; TC: total cholesterol; TG: triglycerides; SBP: systolic blood pressure; DBP: diastolic blood pressure.

**Supplementary Table 2** Threshold Effect Analysis of RAR on Retinopathy Probability (Based on the First Multiple Imputation Dataset)

| Models | Weighted adjusted OR (95%CI) a | *P*-value |
| --- | --- | --- |
| Model I: Linear association |  |  |
| Per 1-unit RAR increase | 1.43 (1.03, 1.98) | **0.0319** c |
| Model II: Nonlinear fit |  |  |
| Inflection point of RAR (K) | 3.14 (3.05-3.22) b |  |
| < K slope | 3.50 (1.29, 9.47) | **0.0166** c |
| > K slope | 1.10 (0.60, 2.03) | 0.7279 |
| Model comparison (Model II vs Model I) |  |  |
| Log-likelihood ratio test |  | **0.0400** c |

**Notes：**

a Adjusted for age, gender, race/ethnicity, poverty-income ratio, smoking status, body mass index, glucose metabolic status, hypertension, hyperlipidemia, and cardiovascular disease history.

b Bootstrap-derived 95% confidence interval (1,000 resamples).

c Bolded values indicate statistically significant results (*P*<0.05).

**Supplementary Table 3** Threshold Effect Analysis of RAR on Retinopathy Probability (Based on the Second Multiple Imputation Dataset)

| Models | Weighted adjusted OR (95%CI) a | | *P*-value |
| --- | --- | --- | --- |
| Model I: Linear association |  | |  |
| Per 1-unit RAR increase | 1.42 (1.03, 1.97) | | **0.0328**c |
| Model II: Nonlinear fit |  | |  |
| Inflection point of RAR (K) | 3.14 (3.05-3.22) b | |  |
| < K slope | 3.47 (1.28, 9.43) | | **0.0174** c |
| > K slope | 1.10 (0.60, 2.02) | | 0.7331 |
| Model comparison (Model II vs Model I) | |  |  |
| Log-likelihood ratio test |  | | **0.0410** c |

**Notes：**

a Adjusted for age, gender, race/ethnicity, poverty-income ratio, smoking status, body mass index, glucose metabolic status, hypertension, hyperlipidemia, and cardiovascular disease history.

b Bootstrap-derived 95% confidence interval (1,000 resamples).

c Bolded values indicate statistically significant results (*P*<0.05).

**Supplementary Table 4** Threshold Effect Analysis of RAR on Retinopathy Probability (Based on the Third Multiple Imputation Dataset)

| Models | Weighted adjusted OR (95%CI) a | | *P*-value |
| --- | --- | --- | --- |
| Model I: Linear association |  | |  |
| Per 1-unit RAR increase | 1.42 (1.03, 1.96) | | **0.0336**c |
| Model II: Nonlinear fit |  | |  |
| Inflection point of RAR (K) | 3.14 (3.05-3.22) b | |  |
| < K slope | 3.46 (1.28, 9.35) | | **0.0174** c |
| > K slope | 1.10 (0.60, 2.01) | | 0.7397 |
| Model comparison (Model II vs Model I) | |  |  |
| Log-likelihood ratio test |  | | **0.0420** c |

**Notes：**

a Adjusted for age, gender, race/ethnicity, poverty-income ratio, smoking status, body mass index, glucose metabolic status, hypertension, hyperlipidemia, and cardiovascular disease history.

b Bootstrap-derived 95% confidence interval (1,000 resamples).

c Bolded values indicate statistically significant results (*P*<0.05).

**Supplementary Table 5** Threshold Effect Analysis of RAR on Retinopathy Probability (Based on the Fourth Multiple Imputation Dataset)

| Models | Weighted adjusted OR (95%CI) a | | *P*-value |
| --- | --- | --- | --- |
| Model I: Linear association |  | |  |
| Per 1-unit RAR increase | 1.43 (1.04, 1.98) | | **0.0312** c |
| Model II: Nonlinear fit |  | |  |
| Inflection point of RAR (K) | 3.14 (3.05-3.22) b | |  |
| < K slope | 3.48 (1.28, 9.41) | | **0.0171** c |
| > K slope | 1.11 (0.61, 2.04) | | 0.7106 |
| Model comparison (Model II vs Model I) | |  |  |
| Log-likelihood ratio test c |  | | **0.0430** c |

**Notes：**

a Adjusted for age, gender, race/ethnicity, poverty-income ratio, smoking status, body mass index, glucose metabolic status, hypertension, hyperlipidemia, and cardiovascular disease history.

b Bootstrap-derived 95% confidence interval (1,000 resamples).

c Bolded values indicate statistically significant results (*P*<0.05).

**Supplementary Table 6** Threshold Effect Analysis of RAR on Retinopathy Probability (Based on the Fifth Multiple Imputation Dataset)

| Models | Weighted adjusted OR (95%CI) a | | *P*-value |
| --- | --- | --- | --- |
| Model I: Linear association |  | |  |
| Per 1-unit RAR increase | 1.43 (1.03, 1.99) | | **0.0333**c |
| Model II: Nonlinear fit |  | |  |
| Inflection point of RAR (K) | 3.14 (3.05-3.22) b | |  |
| < K slope | 3.49 (1.29, 9.44) | | **0.0171** c |
| > K slope | 1.11 (0.60, 2.04) | | 0.7182 |
| Model comparison (Model II vs Model I) | |  |  |
| Log-likelihood ratio test c |  | | **0.0410** c |

**Notes：**

a Adjusted for age, gender, race/ethnicity, poverty-income ratio, smoking status, body mass index, glucose metabolic status, hypertension, hyperlipidemia, and cardiovascular disease history.

b Bootstrap-derived 95% confidence interval (1,000 resamples).

c Bolded values indicate statistically significant results (*P*<0.05).
